# Supplementary material for: Structural mechanisms for the activation of human cardiac KCNQ1 channel by electro-mechanical coupling enhancers
Source: PubMed Central journal article supplement — Proc Natl Acad Sci U S A. 2022 Nov 3;119(45):e2207067119. doi: 10.1073/pnas.2207067119 (PMC9661191; doi:10.1073/pnas.2207067119), 2022-11-03
Supplement: pnas.2207067119.sapp.pdf [file pnas.2207067119.sapp.pdf]

1 **Supplementary Information for:**

2 **Structural mechanisms for the activation of human cardiac KCNQ1**  
3 **channel by electro-mechanical coupling enhancers**

4 Demin Ma<sup>a,1</sup>, Ling Zhong<sup>b,1</sup>, Zhenzhen Yan<sup>b</sup>, Jing Yao<sup>a</sup>, Yan Zhang<sup>a</sup>, Fan Ye<sup>a</sup>, Yuan Huang<sup>c</sup>,  
5 Dongwu Lai<sup>d</sup>, Wei Yang<sup>a,e,f,2</sup>, Panpan Hou<sup>b,2</sup>, Jiangtao Guo<sup>a,d,e,f,g,h,2</sup>

6 <sup>a</sup> Department of Biophysics, and Department of Neurology of the Fourth Affiliated Hospital,  
7 Zhejiang University School of Medicine, Hangzhou, Zhejiang 310058, China;

8 <sup>b</sup> Dr. Neher's Biophysics Laboratory for Innovative Drug Discovery, State Key Laboratory of  
9 Quality Research in Chinese Medicine, Macau University of Science and Technology, Taipa,  
10 Macao SAR, China

11 <sup>c</sup> Department of Cardiology, First Affiliated Hospital, Zhejiang University School of Medicine,  
12 Hangzhou, Zhejiang 310058, China;

13 <sup>d</sup> Department of Cardiology, Key Laboratory of Cardiovascular Intervention and Regenerative  
14 Medicine of Zhejiang Province, Sir Run Run Shaw Hospital, Zhejiang University School of  
15 Medicine, Hangzhou, Zhejiang 310016, China

16 <sup>e</sup> Liangzhu Laboratory, Zhejiang University Medical Center, 1369 West Wenyi Road,  
17 Hangzhou, Zhejiang 311121, China

18 <sup>f</sup> NHC and CAMS Key Laboratory of Medical Neurobiology, MOE Frontier Science Center  
19 for Brain Science and Brain-machine Integration, School of Brain Science and Brain Medicine,  
20 Zhejiang University

21 <sup>g</sup> State Key Laboratory of Plant Physiology and Biochemistry, College of Life Sciences,  
22 Zhejiang University, Hangzhou, Zhejiang 310058, China

23 <sup>h</sup> Cancer Center, Zhejiang University, Hangzhou, Zhejiang 310058, China

24  
25 <sup>1</sup> These authors contributed equally to this work.

26 <sup>2</sup> Correspondence: jiangtaoquo@zju.edu.cn (J.G.), pphou@must.edu.mo (P.H.),  
27 yangwei@zju.edu.cn (W.Y.)

|    |                                            |
|----|--------------------------------------------|
| 29 | <b>This PDF file includes:</b>             |
| 30 | <b>Supplementary Materials and Methods</b> |
| 31 | <b>Supplementary Fig. S1-S10</b>           |
| 32 | <b>Supplementary Table S1</b>              |
| 33 | <b>Supplementary Movie Legends</b>         |
| 34 | <b>Supplementary References</b>            |
| 35 |                                            |

## 36 **Supplementary Materials and Methods**

### 37 **Protein expression and purification**

38 The full-length human KCNQ1 gene was synthesized and cloned into the modified pEZT-BM  
39 vector with a C-terminal strep tag. The human CaM gene was cloned into pEZT-BM vector  
40 with a C-terminal Histidine tag. KCNQ1 and CaM complex were heterologously expressed in  
41 Human Embryonic Kidney (HEK) 293S suspension cells (Life Technologies) maintained at  
42 30 °C in SMM 293-TI complete medium (Sino Biological Inc.) supplemented with 2% fetal  
43 bovine serum (FBS, Yeasen Biotechnology (Shanghai) Co., Ltd.). The P3 baculovirus was  
44 generated via the BacMam system (Thermo Fisher Scientific) and used for expression when  
45 cell density reached  $3.5 \times 10^6$  cells/mL. P3 baculovirus mixture of KCNQ1: CaM (6:1) was used  
46 for transduction of HEK293S cells for protein expression. To boost protein expression, 10 mM  
47 sodium butyrate was added 12 h post-transduction. Cells were harvested after 48 h, then flash-  
48 frozen in liquid nitrogen and stored at -80 °C until needed.

49 Cells were resuspended and lysed by sonication in buffer A (20 mM Tris, pH 8.0, 150 mM  
50 KCl, 3 mM DTT) supplemented with a protease inhibitor cocktail (2 µg/mL DNase I,  
51 0.5 µg/mL pepstatin, 2 µg/mL leupeptin, 1 µg/mL aprotinin, and 1 mM PMSF). The lysate was  
52 then solubilized with 1.5% n-dodecyl-β-D-maltoside (DDM, Anatrace) and 0.3% cholesteryl  
53 hemisuccinate tris salt (CHS, Anatrace) at 4°C for 3 h. The insoluble cell fragment was  
54 removed by centrifugation at 48,000g for 50 min at 4°C. The supernatant was incubated with  
55 Strep-Tactin Sepharose resin (IBA) at 4°C for 1.5 h with gentle rotation. Beads were loaded  
56 onto a gravity column and washed with buffer B (buffer A supplemented with 0.05% DDM and  
57 0.01% CHS) for 4 CVs (column volumes), followed by washing with buffer C (buffer A  
58 supplemented with 0.03% GDN) for 16 CVs. The protein was then eluted with buffer C plus  
59 10 mM d-Desthiobiotin (Sigma) and further purified on a Superose 6 gel filtration column (GE  
60 Healthcare) in buffer D (buffer A supplemented with 4mM EGTA). The peak fraction was  
61 collected and concentrated for cryo-EM sample preparation. The typical yield of KCNQ1-CaM  
62 is about 3.4 mg from 1 L HEK293S cell culture. For KCNQ1-CaM<sub>ML277</sub> structure, the purified  
63 protein was incubated with 0.125 mM ML277 (MedChemExpress), for KCNQ1-CaM<sub>ML277-PIP2</sub>  
64 structure, the protein was incubated with 0.125 mM ML277 and 1 mM PIP<sub>2</sub>. The PIP<sub>2</sub> we used

65 is 1,2-dioctanoyl-sn-glycero-3-phospho-(1'-myo-inositol-4',5'-bisphosphate) (ammonium salt)  
66 purchased from Avanti.

67

### 68 **Cryo-EM sample preparation and data acquisition**

69 For grids preparation, 3  $\mu\text{L}$  concentrated protein was loaded onto glow-discharged R1.2/1.3  
70 Quantifoil grids at 4°C under 100% humidity. Grids were blotted for 4.5 seconds and plunge-  
71 frozen in liquid ethane using a Vitrobot Mark IV (FEI). Micrographs were acquired on a Titan  
72 Krios microscope (FEI) operated at a voltage of 300 kV with a K2 summit direct electron  
73 detector (Gatan) via SerialEM (1) following standard procedure. A calibrated magnification of  
74  $49310\times$  was used for imaging, yielding a pixel size of 1.014 Å. The defocus range was set from  
75  $-1.1 \mu\text{m}$  to  $-1.3 \mu\text{m}$ . Micrographs were dose-fractionated to 40 frames with a dose rate of 8  
76  $\text{e}^-/\text{pixel}/\text{s}$  and a total exposure time of 8 s, corresponding to a total dose of  $\sim 64 \text{e}^-/\text{Å}^2$ .

77

### 78 **Image processing**

79 Motion correction and CTF parameters estimation were performed with the MotionCorr2 (2)  
80 and the GCTF (3) programs, respectively. All image processing steps were carried out with  
81 RELION 3.0 (4).

82 For KCNQ1-CaM<sub>apo</sub>, 2,957 micrographs were collected and 1,683,616 particles were auto-  
83 picked and extracted with a binning factor of 3 for 2D classification. The following two rounds  
84 of 3D classification with 1,370,276 selected particles were performed using the map of human  
85 KCNQ1-CaM complex (PDB: 6UZZ) (5) as a reference. After 3D classification, selected  
86 particles were combined and re-extracted to the pixel size of 1.014 Å for 3D refinement with a  
87 *C4* symmetry and Bayesian polishing via RELION 3.0. The final resolution of the EM map by  
88 3D reconstruction of 169,344 particles was 3.5 Å.

89 For KCNQ1-CaM<sub>ML277</sub>, 2,058 micrographs were collected and 1,197,453 particles were  
90 auto-picked and extracted with a binning factor of 3 for 2D classification. The following three  
91 rounds of 3D classification with 941,138 selected particles were performed using the map of  
92 KCNQ1-CaM<sub>apo</sub> as a reference. After 3D classification, selected particles were combined and  
93 re-extracted to the pixel size of 1.014 Å for 3D refinement with a *C4* symmetry and Bayesian

94 polishing via RELION 3.0. The final resolution of the EM map by 3D reconstruction of 200,556  
95 particles was 2.6 Å.

96 For KCNQ1-CaM<sub>ML277</sub>-PIP2-A and KCNQ1-CaM<sub>ML277</sub>-PIP2-B, 1,803 micrographs were  
97 collected and 1,018,488 particles were auto-picked and extracted with a binning factor of 3 for  
98 2D classification. The following two rounds of 3D classification with 750,461 selected  
99 particles were performed using the map of KCNQ1-CaM<sub>ML277</sub> as a reference. After 3D  
100 classification, two different conformational 3D reconstructions were obtained, named KCNQ1-  
101 CaM<sub>ML277</sub>-PIP2-A and KCNQ1-CaM<sub>ML277</sub>-PIP2-B, respectively. Then the selected particles were  
102 combined and re-extracted to the pixel size of 1.014 Å for 3D refinement with a *C4* symmetry  
103 and Bayesian polishing via RELION 3.0. The final resolution of the EM map by 3D  
104 reconstruction of KCNQ1-CaM<sub>ML277</sub>-PIP2-A (103,745 particles) was 3.1 Å, and the resulting 3D  
105 reconstruction of KCNQ1-CaM<sub>ML277</sub>-PIP2-B (257,550 particles) was 2.5 Å,

106 The resolution was estimated by applying a soft mask around the protein density and the  
107 gold-standard Fourier shell correlation (FSC) = 0.143 criterion. Local resolution maps were  
108 calculated with RELION 3.0.

109

### 110 **Model building, refinement, and validation**

111 *De novo* atomic models were built in Coot (6) based on the 2.6 Å resolution map of KCNQ1-  
112 CaM<sub>ML277</sub>. The amino acid assignment was achieved based on the clearly defined density for  
113 bulky residues (Phe, Trp, Tyr, and Arg) and the model of KCNQ1-CaM complex (PDB: 6UZZ)  
114 (5) was used as a reference. PHENIX (7) was utilized for model refinement against cryo-EM  
115 maps using real-space refinement, with secondary structure restraints and non-crystallography  
116 symmetry applied. The models of KCNQ1-CaM<sub>apo</sub>, KCNQ1-CaM<sub>ML277</sub>-PIP2-A, and KCNQ1-  
117 CaM<sub>ML277</sub>-PIP2-B were built using the model of KCNQ1-CaM<sub>ML277</sub> as a template. The  
118 MolProbity (8) was used for model geometry statistics generation. The Van der Waals radii of  
119 the pore were calculated using HOLE (9). All figures were prepared in PyMoL (The PyMOL  
120 Molecular Graphics System, Version 1.8 Schrödinger, LLC.) and Chimera (10).

121

### 122 **Electrophysiology**

123 Constructs and mutagenesis: Overlap extension and high-fidelity PCR were used for generating  
124 KCNQ1 point mutations. Each mutation was verified by DNA sequencing. The mMessage T7  
125 polymerase kit (Thermo Fisher Scientific) was then used for synthesizing cRNA of WT  
126 KCNQ1 and its mutations.

127 Oocyte expression: Stage V (or VI) oocytes were obtained from *Xenopus laevis* by  
128 laparotomy surgery, following the protocol approved by the Animal Studies Committee of  
129 Macau University of Science and Technology (Protocol #: MUST-NSFC-2021022601HPP).  
130 Oocytes were digested by collagenase (0.5 mg/ml, Sigma Aldrich, St Louis, MO) to remove  
131 the follicle membrane. KCNQ1 cRNAs (9.2 ng) were injected into each oocyte with a  
132 microinjector (RWD R-480 model). After injection, oocytes were kept in the ND96 solution  
133 (in mM): 96 NaCl, 2 KCl, 1.8 CaCl<sub>2</sub>, 1 MgCl<sub>2</sub>, 5 HEPES, 2.5 CH<sub>3</sub>COCO<sub>2</sub>Na, 1:100 Pen-Strep,  
134 pH 7.6) at 18°C for 2-6 days to allow sufficient KCNQ1 channel expression. All chemicals  
135 were purchased from Sigma Aldrich.

136 Two-electrode voltage clamp (TEVC): After channel expression, oocytes were transferred  
137 to a TEVC platform (Warner OC-725D amplifier + HEKA Patchmaster acquisition software)  
138 for whole-oocyte current recordings. Currents were sampled at 1 kHz and filtered at 2 kHz.  
139 Microelectrodes were made with a Sutter puller (P-1000) with resistances at ~1 MΩ when filled  
140 with 3 M KCl. For ML277 experiments, ML277 stock (Sigma Aldrich, in DMSO) was added  
141 to the bath and diluted to 1 μM. All recordings were performed at room temperature (21–23 °C).

142 Electrophysiology Data analysis: Data were analyzed with Clampfit (Axon Instruments,  
143 Inc., Sunnyvale, CA), Sigmaplot (SPSS, Inc., San Jose, CA), and IGOR (Wavemetrics, Lake  
144 Oswego, OR). G–V curves were fitted a Boltzmann equation  $1/(1+\exp(-z*F*(V-V_{50})/RT))$ ,  
145 where  $V$  is the voltage,  $z$  is the equivalent valence,  $V_{50}$  is the half-maximal voltage,  $F$  is the  
146 Faraday constant,  $R$  is the gas constant, and  $T$  is the absolute temperature. For activation ( $\tau_f$   
147 and  $\tau_s$ ) and deactivation ( $\tau_d$ ) time constants of KCNQ1 currents in Figure 1, KCNQ1 activation  
148 currents were fitted with a double exponential equation to get the  $\tau_f$  and  $\tau_s$  for control, and were  
149 fitted separately with a single exponential function to get the  $\tau_f$  and  $\tau_s$  for currents after adding  
150 ML277.

151

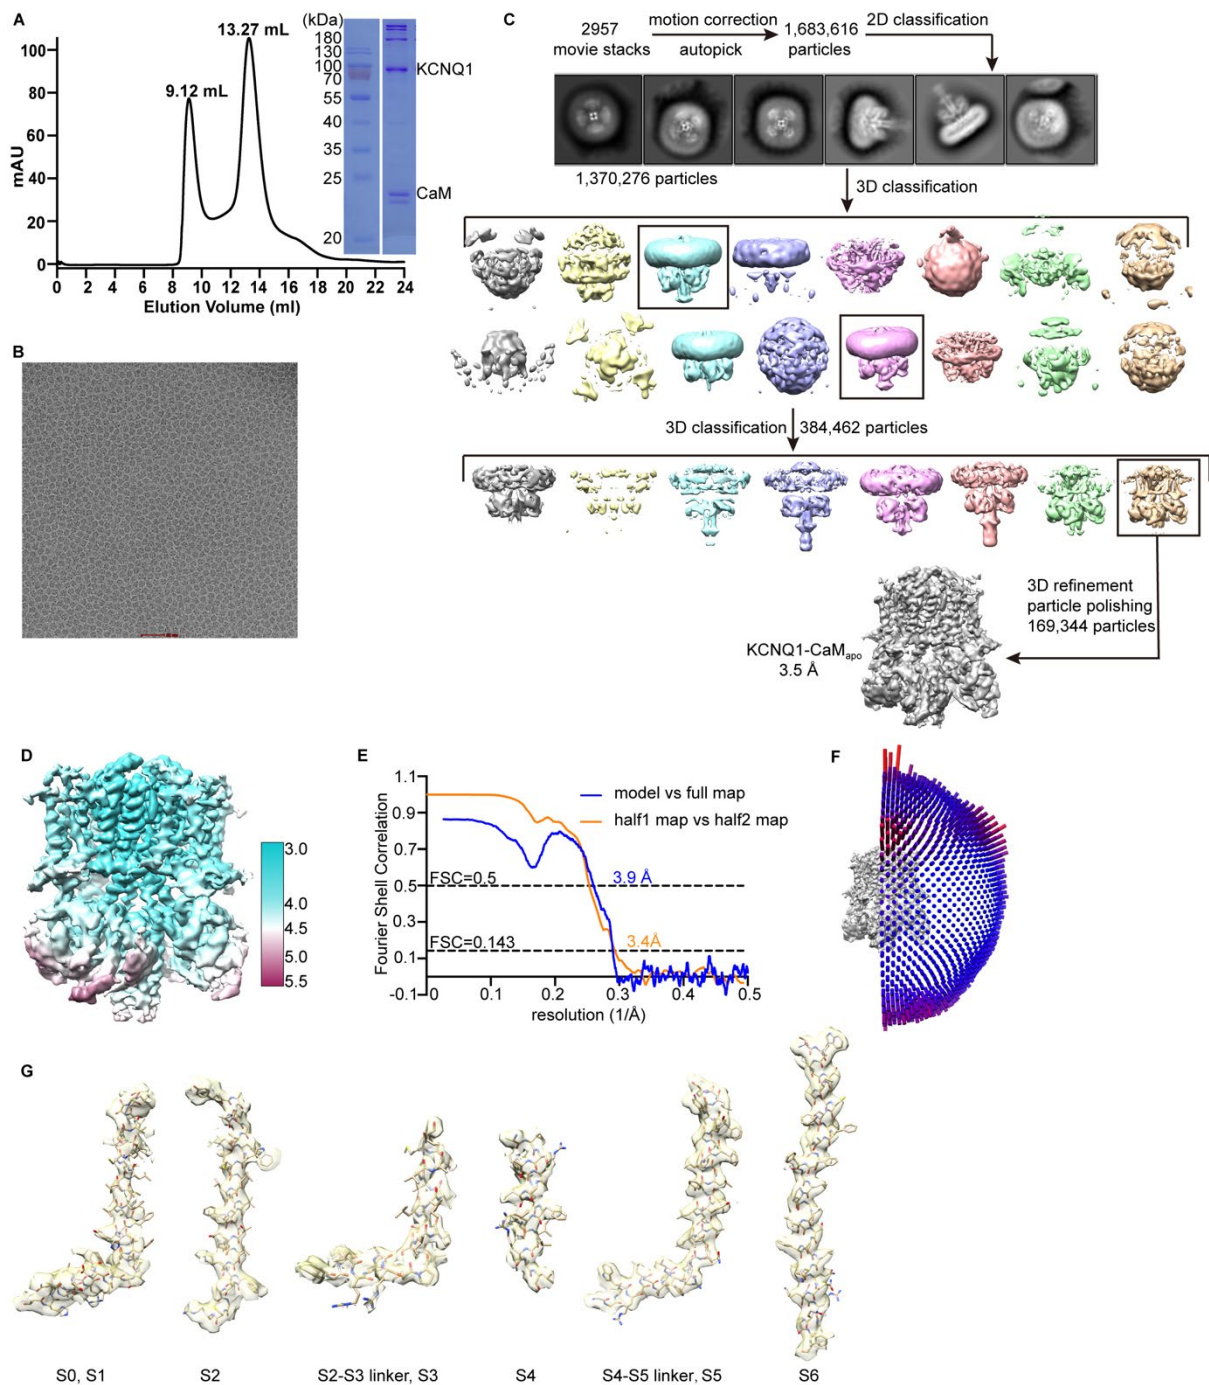

152

S0, S1

S2

S2-S3 linker, S3

S4

S4-S5 linker, S5

S6

153 **Fig. S1. Structure determination of KCNQ1-CaM<sub>apo</sub>.**

154 (A) Size-exclusion chromatography of KCNQ1-CaM<sub>apo</sub> on Superose 6 (GE Healthcare) and  
 155 SDS-PAGE analysis of the final sample.

156 (B) Representative cryo-EM micrograph of KCNQ1-CaM<sub>apo</sub>.

157 (C) Flowchart of image processing for KCNQ1-CaM<sub>apo</sub> particles.

158 (D) The density map of KCNQ1-CaM<sub>apo</sub> colored by local resolution. The local resolution was

159 estimated with RELION 3.0 and generated in Chimera.

160 (E) The Gold-standard Fourier shell correlation (FSC) curves of the final 3D reconstruction of  
161 KCNQ1-CaM<sub>apo</sub>, and the FSC curve for cross-validation between the map and the model of  
162 KCNQ1-CaM<sub>apo</sub>.

163 (F) Euler angle distribution of KCNQ1-CaM<sub>apo</sub> particles used in the final 3D reconstruction,  
164 with the heights of the cylinders corresponding to the number of particles.

165 (G) Sample maps of the KCNQ1-CaM<sub>apo</sub> structure. The S4 and C-terminal half of S3 seem  
166 dynamic and are resolved in a relatively lower resolution.

167



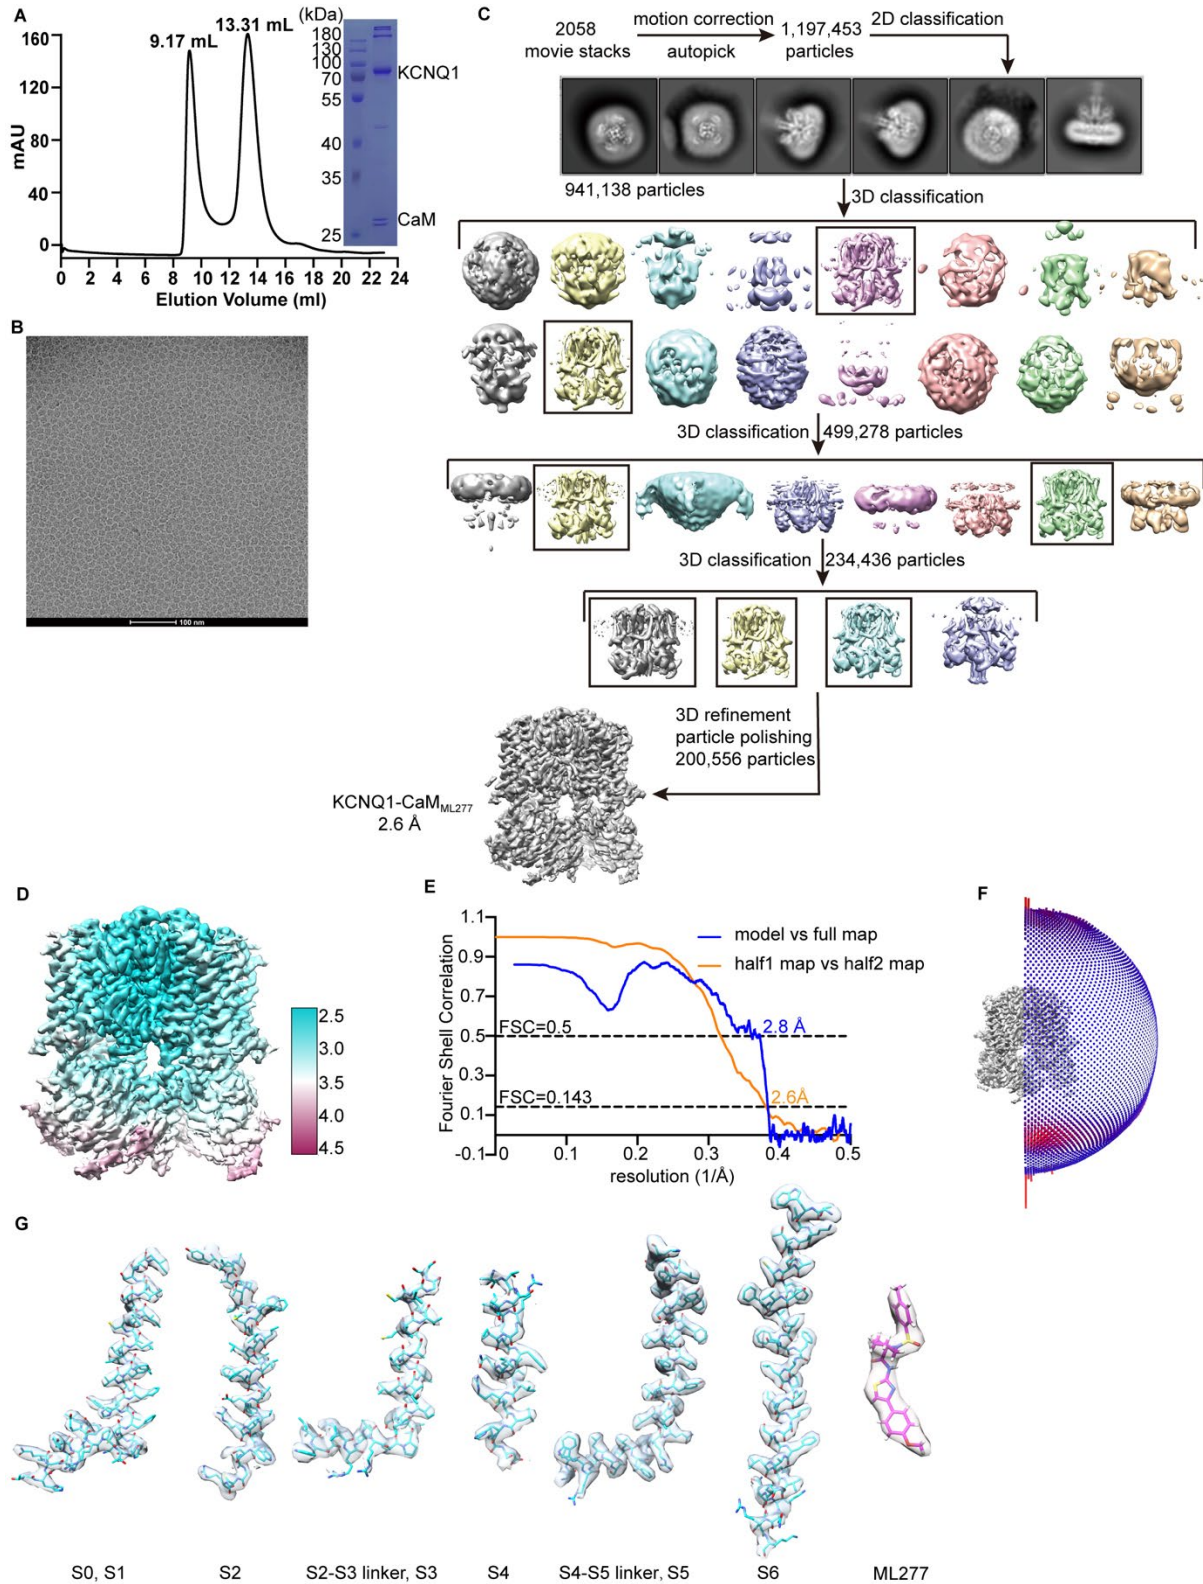

168

S0, S1

S2

S2-S3 linker, S3

S4

S4-S5 linker, S5

S6

ML277

169 **Fig. S2. Structure determination of KCNQ1-CaM<sub>ML277</sub>.**

170 (A) Size-exclusion chromatography of KCNQ1-CaM<sub>ML277</sub> on Superose 6 (GE Healthcare) and  
 171 SDS-PAGE analysis of the final sample.

- 172 (B) Representative cryo-EM micrograph of KCNQ1-CaM<sub>ML277</sub>.
- 173 (C) Flowchart of image processing for KCNQ1-CaM<sub>ML277</sub> particles.
- 174 (D) The density map of KCNQ1-CaM<sub>ML277</sub> colored by local resolution. The local resolution  
175 was estimated with RELION 3.0 and generated in Chimera.
- 176 (E) The Gold-standard Fourier shell correlation (FSC) curves of the final 3D reconstruction of  
177 KCNQ1-CaM<sub>ML277</sub>, and the FSC curve for cross-validation between the map and the model of  
178 KCNQ1-CaM<sub>ML277</sub>.
- 179 (F) Euler angle distribution of KCNQ1-CaM<sub>ML277</sub> particles used in the final 3D reconstruction,  
180 with the heights of the cylinders corresponding to the number of particles.
- 181 (G) Sample maps of the KCNQ1-CaM<sub>ML277</sub> structure.
- 182

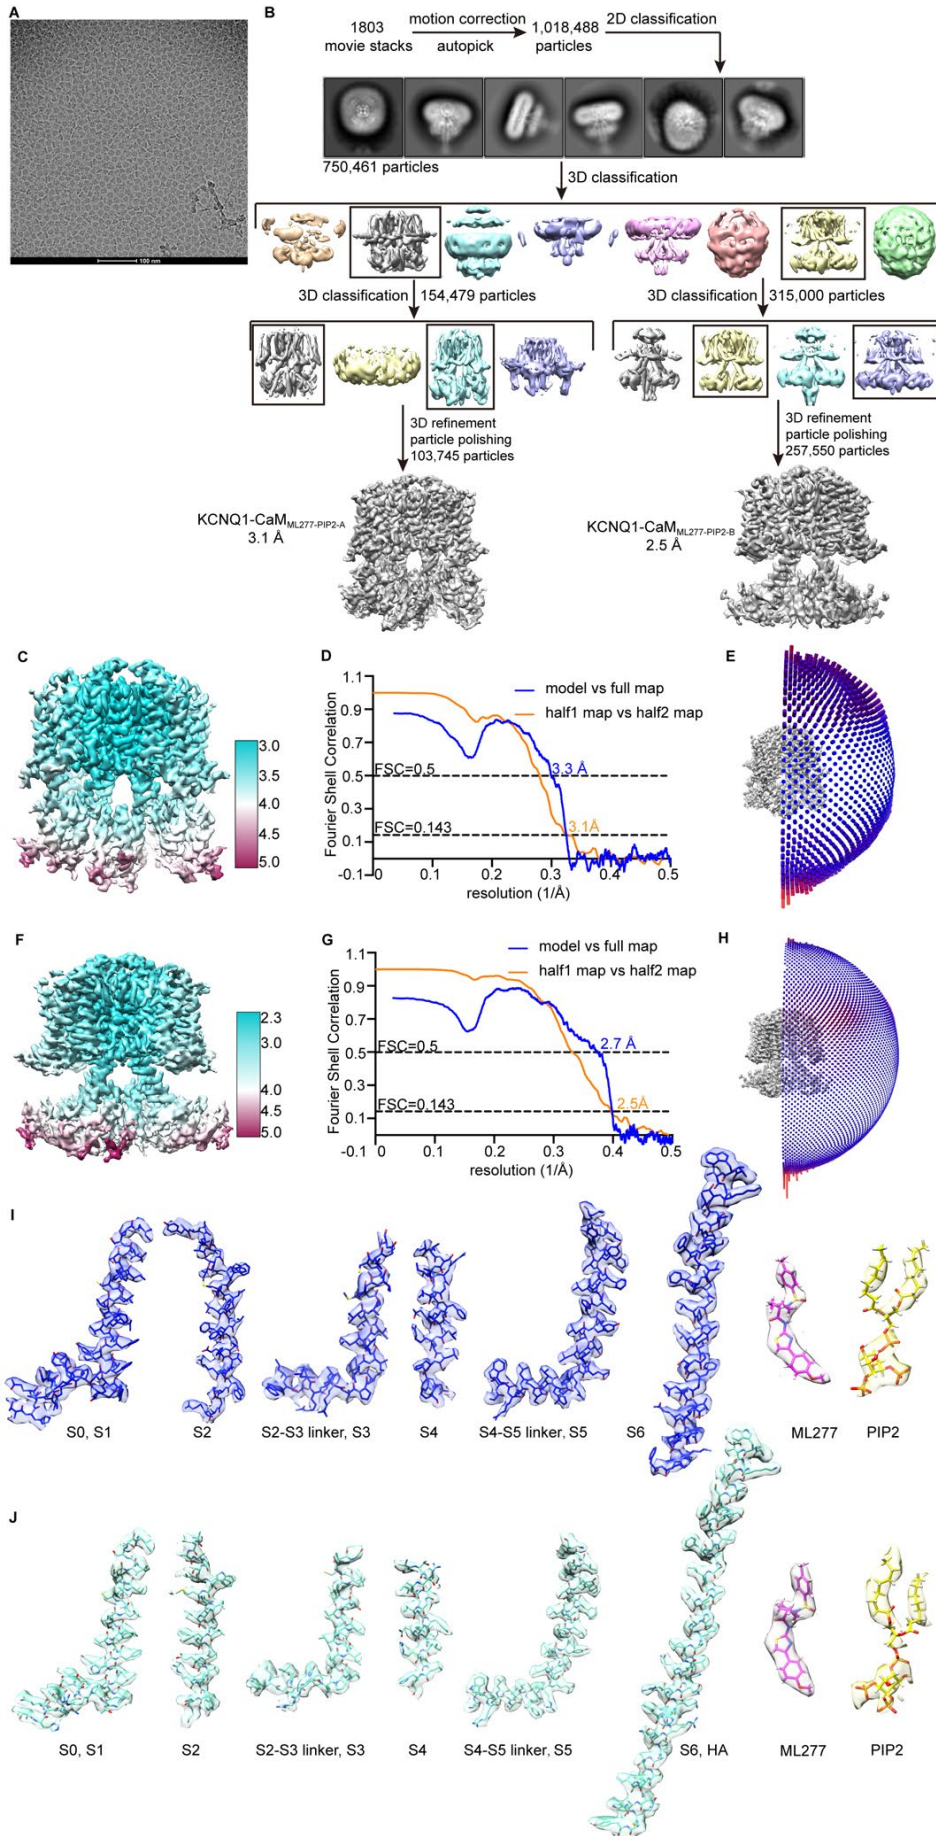

184 **Fig. S3. Structure determination of KCNQ1-CaM<sub>ML277</sub>-PIP<sub>2</sub>.**

185 (A) Representative cryo-EM micrograph of KCNQ1-CaM<sub>ML277</sub>-PIP<sub>2</sub>.

186 (B) Flowchart of image processing for KCNQ1-CaM<sub>ML277</sub>-PIP<sub>2</sub> particles.

187 (C) The density map of KCNQ1-CaM<sub>ML277</sub>-PIP<sub>2</sub>-A colored by local resolution. The local  
188 resolution was estimated with RELION 3.0 and generated in Chimera.

189 (D) The Gold-standard Fourier shell correlation (FSC) curves of the final 3D reconstruction of  
190 KCNQ1-CaM<sub>ML277</sub>-PIP<sub>2</sub>-A, and the FSC curve for cross-validation between the map and the  
191 model of KCNQ1-CaM<sub>ML277</sub>-PIP<sub>2</sub>-A.

192 (E) Euler angle distribution of KCNQ1-CaM<sub>ML277</sub>-PIP<sub>2</sub>-A particles used in the final 3D  
193 reconstruction, with the heights of the cylinders corresponding to the number of particles.

194 (F) The density map of KCNQ1-CaM<sub>ML277</sub>-PIP<sub>2</sub>-B colored by local resolution. The local  
195 resolution was estimated with RELION 3.0 and generated in Chimera.

196 (G) The Gold-standard Fourier shell correlation (FSC) curves of the final 3D reconstruction of  
197 KCNQ1-CaM<sub>ML277</sub>-PIP<sub>2</sub>-B, and the FSC curve for cross-validation between the map and the  
198 model of KCNQ1-CaM<sub>ML277</sub>-PIP<sub>2</sub>-B.

199 (H) Euler angle distribution of KCNQ1-CaM<sub>ML277</sub>-PIP<sub>2</sub>-B particles used in the final 3D  
200 reconstruction, with the heights of the cylinders corresponding to the number of particles.

201 (I) Sample maps of the KCNQ1-CaM<sub>ML277</sub>-PIP<sub>2</sub>-A structure.

202 (J) Sample maps of the KCNQ1-CaM<sub>ML277</sub>-PIP<sub>2</sub>-B structure.

203



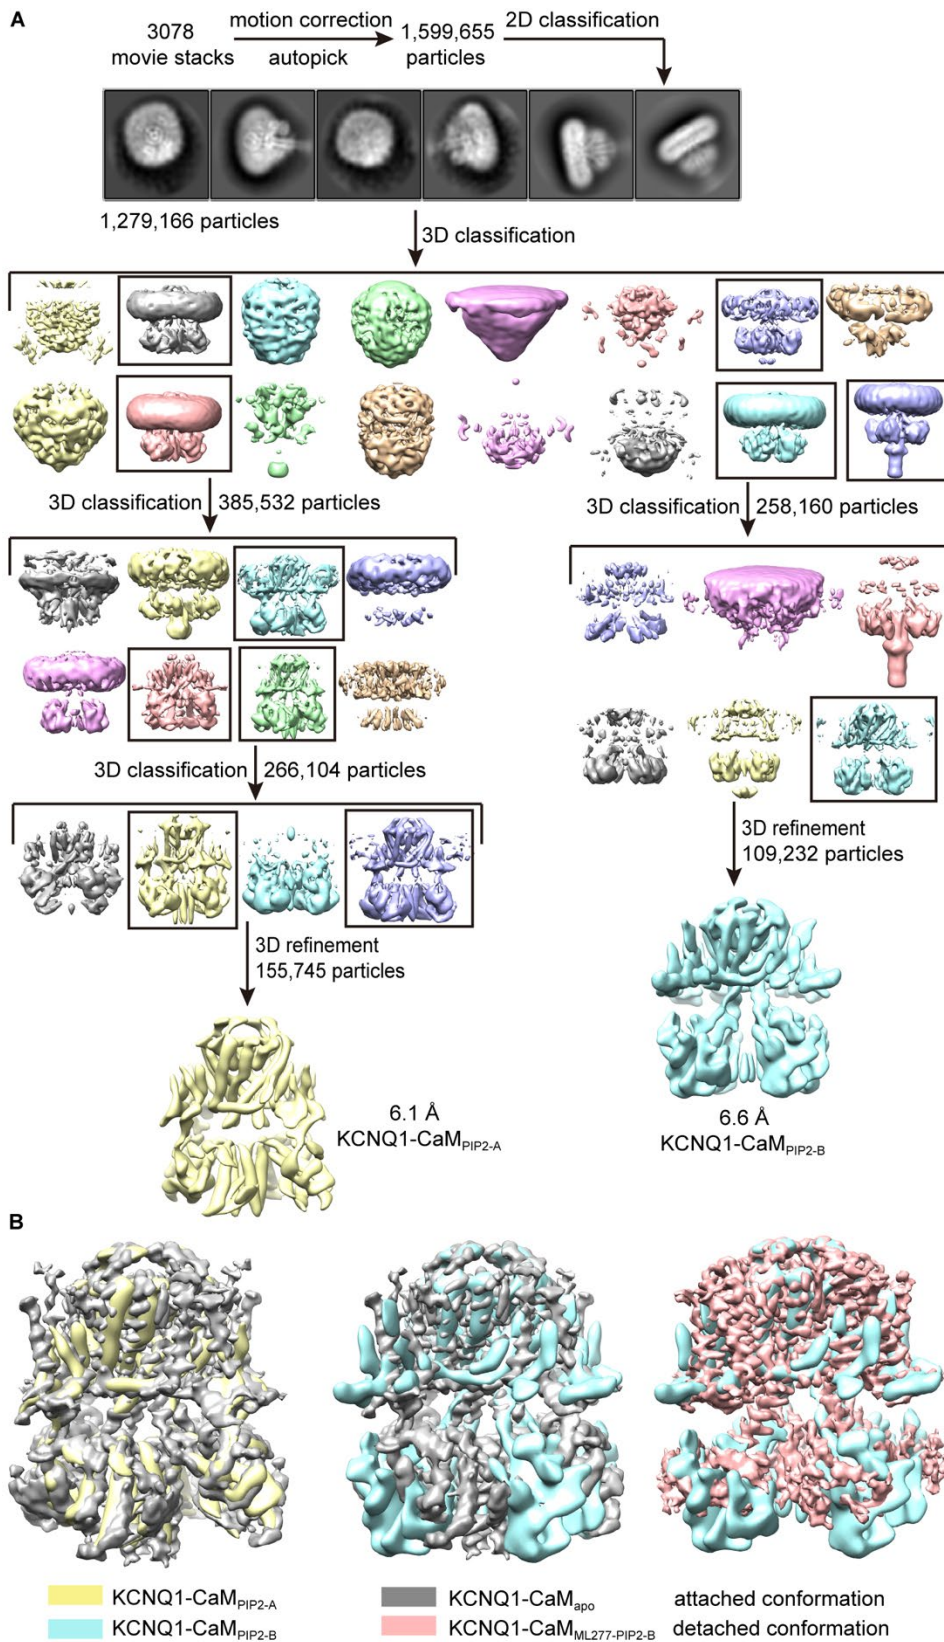

204

205 **Fig. S4. Structure determination of KCNQ1-CaM<sub>PIP2</sub>.**

206 (A) Flowchart of image processing for KCNQ1-CaM<sub>PIP2</sub> particles.

207 (B) Map comparisons of KCNQ1-CaM<sub>apo</sub> (gray) and KCNQ1-CaM<sub>PIP2-A</sub> (yellow), KCNQ1-

208 CaM<sub>apo</sub> (gray) and KCNQ1-CaM<sub>PIP2-B</sub> (cyan), and KCNQ1-CaM<sub>PIP2-B</sub> (cyan) and KCNQ1-  
209 CaM<sub>ML277-PIP2-B</sub> (salmon). While KCNQ1-CaM<sub>PIP2-A</sub> adopts an attached conformation like  
210 KCNQ1-CaM<sub>apo</sub>, KCNQ1-CaM<sub>PIP2-B</sub> is in an intermediate conformation between the attached  
211 (KCNQ1-CaM<sub>apo</sub>) and detached conformation (KCNQ1-CaM<sub>ML277-PIP2-B</sub>).

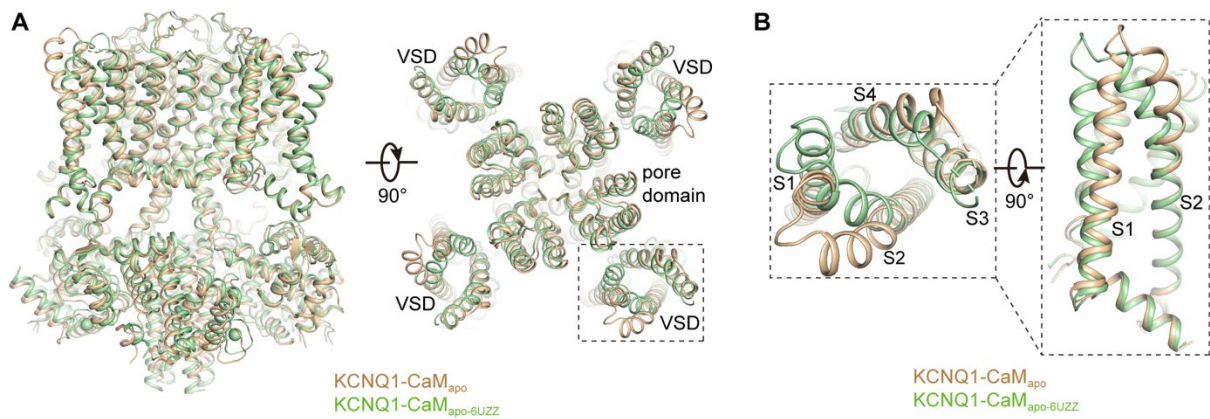

212

213

**Fig. S5. Structural comparison of KCNQ1-CaM<sub>apo</sub> and KCNQ1-CaM<sub>apo-6UZZ</sub>.**

214

(A) Structural comparison between KCNQ1-CaM<sub>apo</sub> (wheat) and KCNQ1-CaM<sub>apo-6UZZ</sub> (green)

215

in the side view (left) and top view (right).

216

(B) Superposition of VSDs in KCNQ1-CaM<sub>apo</sub> (wheat) and KCNQ1-CaM<sub>apo-6UZZ</sub> (green) in

217

top view (left) and side view (right).

218

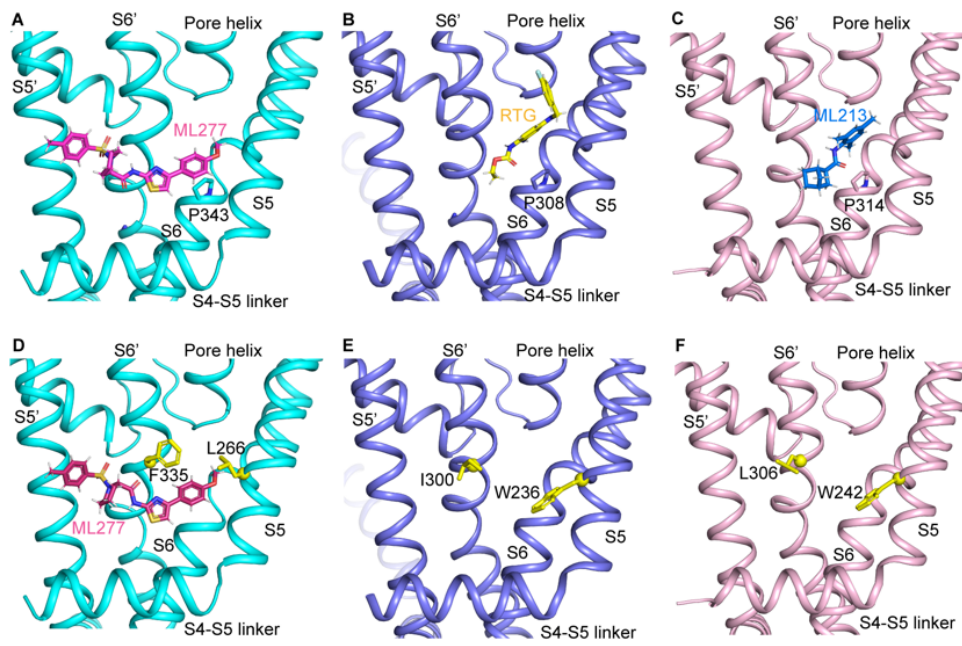

G

Sequence alignment of S5

```

                266
KCNQ1  HRQELITT L YIGFLGLI FSSYFVYLAEK
KCNQ2  HSKELVTAW YIGFLCLILASFLVYLAEK
KCNQ3  HSKELITAW YIGFLTLILSSFLVYLVEK
KCNQ4  HSKELITAW YIGFLVLI FASFLVYLAEK
KCNQ5  HSKELITAW YIGFLVLI FSSFLVYLVEK

```

Sequence alignment of S6

```

                335
KCNQ1  WVGKTIASCFSVFA ISFFALPAGILGSGFALKVQQ
KCNQ2  WNGRLLAATFTL I GVSFFALPAGILGSGFALKVQE
KCNQ3  WEGRLIAATFSL I GVSFFALPAGILGSGLALKVQE
KCNQ4  WLGRVLAAGFAL LG ISFFALPAGILGSGFALKVQE
KCNQ5  WLGRLLSAGFAL LG ISFFALPAGILGSGFALKVQE

```

219

220 **Fig. S6. Comparison of binding sites of ML277, retigabine (RTG), and ML213 in KCNQ**  
 221 **channels.**

222 (A) The ML277 binding site in KCNQ1-CaM<sub>ML277</sub>. The side chain of Pro343 in S6 is shown  
 223 as sticks.

224 (B) The RTG binding site in KCNQ2-CaM<sub>RTG</sub> (PDB: 7CR2). The side chain of Pro308 in S6  
 225 is shown as sticks.

226 (C) The ML213 binding site in KCNQ4-CaM<sub>ML213</sub> (PDB: 7VNQ). The side chain of Pro314 in  
 227 S6 is shown as sticks.

228 (D) The Phe335 and Leu266 in KCNQ1-CaM<sub>ML277</sub>.

229 (E) The Ile300 and Trp236 in KCNQ2-CaM<sub>RTG</sub> (PDB: 7CR2).

230 (F) The Leu306 and Trp242 in KCNQ4-CaM<sub>ML213</sub> (PDB: 7VNQ).

231 (G) Sequence alignment of S5 and S6 segments among human KCNQ family members.



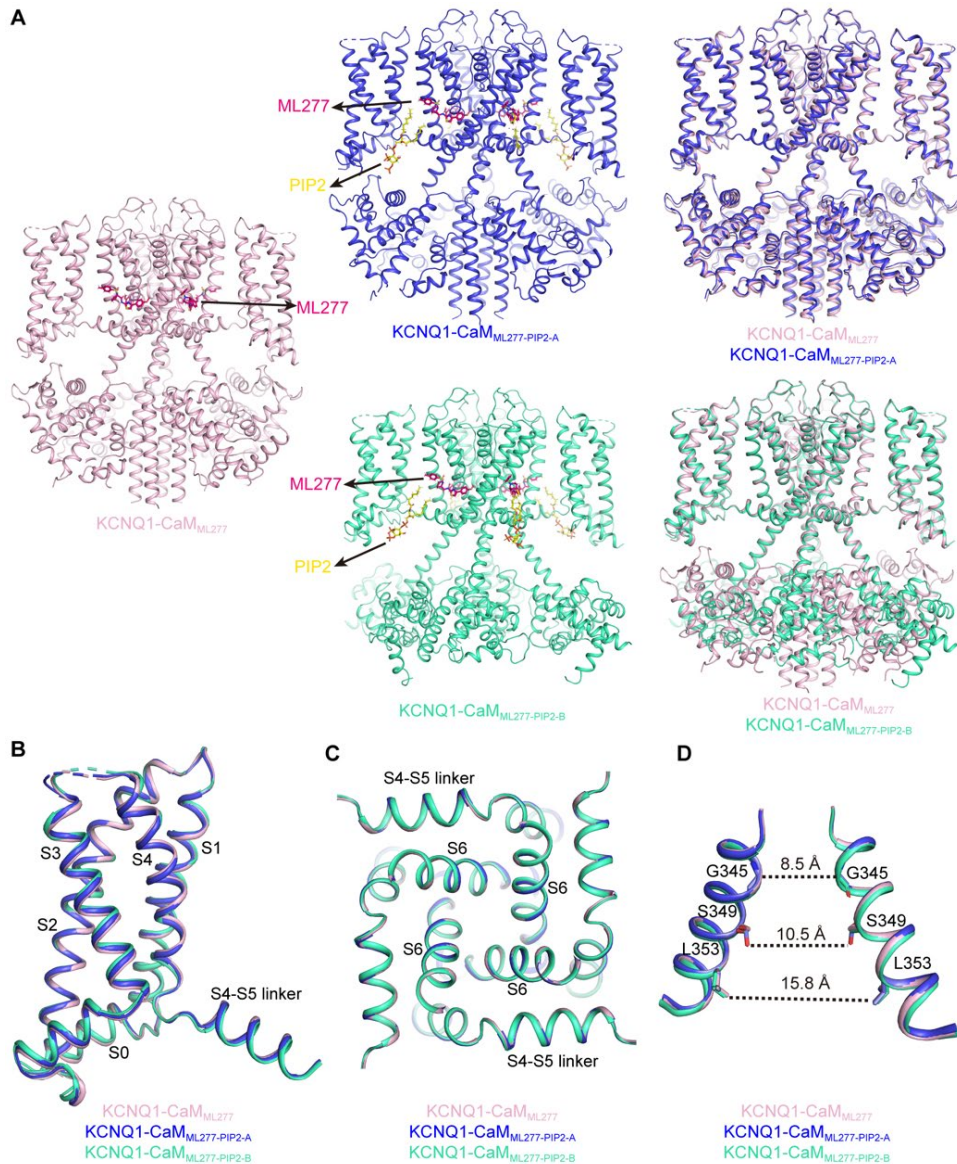

232

233 **Fig. S7. Structural comparison of KCNQ1-CaM<sub>ML277</sub>, KCNQ1-CaM<sub>ML277</sub>-PIP2-A and**  
 234 **KCNQ1-CaM<sub>ML277</sub>-PIP2-B.**

235 (A) Comparisons of overall structures of KCNQ1-CaM<sub>ML277</sub> (pink) and KCNQ1-CaM<sub>ML277</sub>-  
 236 PIP2-A (blue), and KCNQ1-CaM<sub>ML277</sub> and KCNQ1-CaM<sub>ML277</sub>-PIP2-B (green).

237 (B) Structural comparison of VSDs in KCNQ1-CaM<sub>ML277</sub>, KCNQ1-CaM<sub>ML277</sub>-PIP2-A and  
 238 KCNQ1-CaM<sub>ML277</sub>-PIP2-B.

239 (C) Structural comparison of PDs in KCNQ1-CaM<sub>ML277</sub>, KCNQ1-CaM<sub>ML277</sub>-PIP2-A, and  
 240 KCNQ1-CaM<sub>ML277</sub>-PIP2-B in the bottom view.

241 (D) Structural comparison of the activation gates in KCNQ1-CaM<sub>ML277</sub>, KCNQ1-CaM<sub>ML277</sub>-  
 242 PIP2-A, and KCNQ1-CaM<sub>ML277</sub>-PIP2-B in the side view.

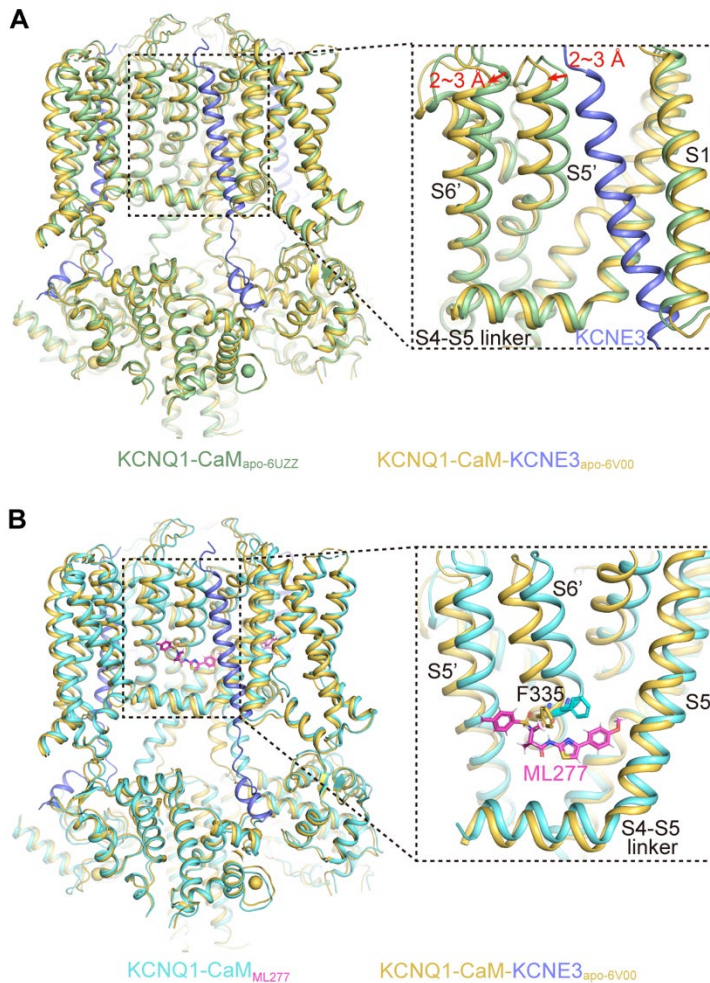

243

244 **Fig S8. Structural comparison indicates that KCNE3 may alter interactions between**  
 245 **ML277 and KCNQ1.**

246 (A) Structural comparison of KCNQ1-CaM<sub>apo-6UZZ</sub> and KCNQ1-CaM-KCNE3<sub>apo-6V00</sub>. Red  
 247 arrows indicate the shift of S5 and S6 upon KCNE3 binding.

248 (B) Structural comparisons of KCNQ1-CaM<sub>ML277</sub> and KCNQ1-CaM-KCNE3<sub>apo-6V00</sub>. ML277  
 249 would form clashes with the Phe335 side chain if it bound to the KCNQ1-CaM-KCNE3  
 250 complex.

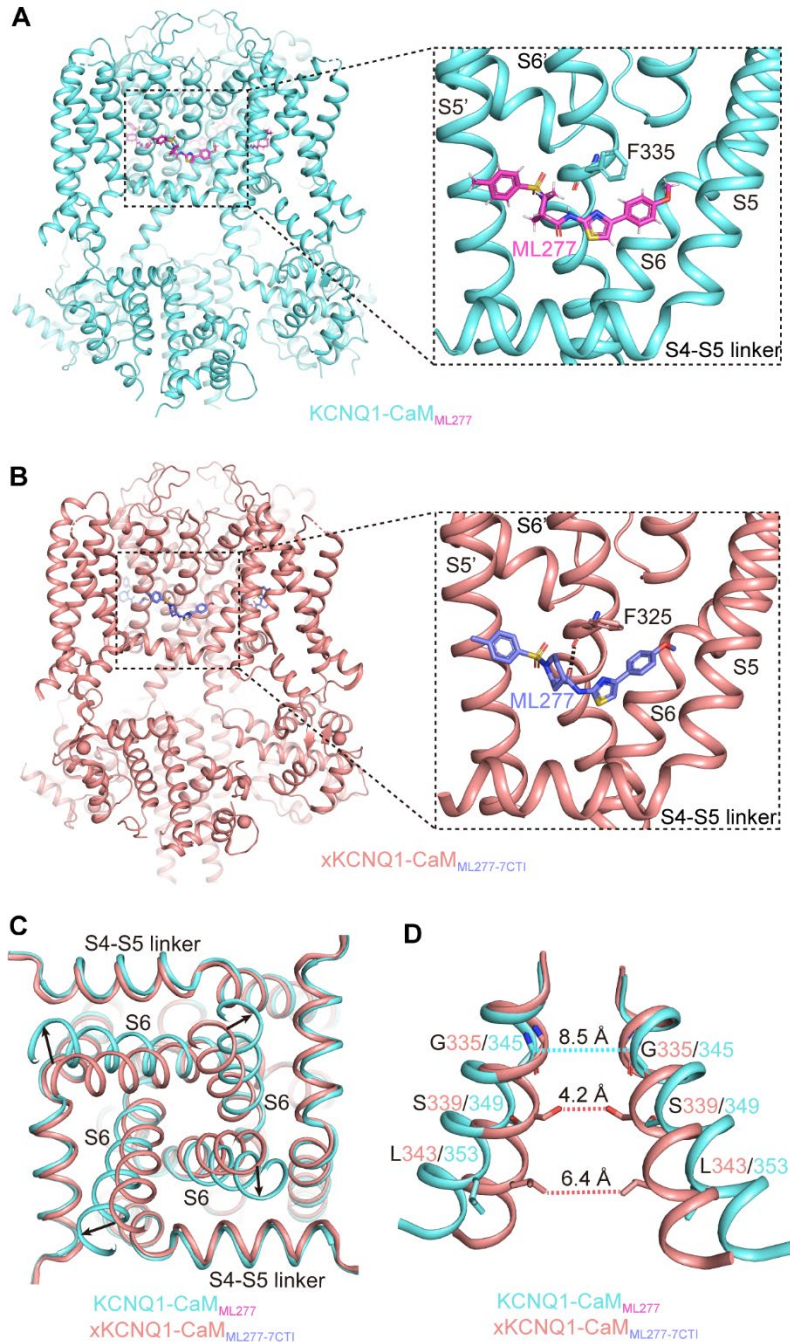

251

252 **Fig S9. Structural comparison of KCNQ1-CaM<sub>ML277</sub> and xKCNQ1-CaM<sub>ML277-7CTI</sub>.**

253 (A) ML277 bound in KCNQ1-CaM<sub>ML277</sub>. Side chain of Phe335 is shown as sticks.

254 (B) ML277 bound in xKCNQ1-CaM<sub>ML277-7CTI</sub>. The dashed line indicates the electrostatic  
 255 repulsion between the carbonyl in ML277 and the mainchain carbonyl of Phe335.

256 (C) Structural differences of PDs in KCNQ1-CaM<sub>ML277</sub> and xKCNQ1-CaM<sub>ML277-7CTI</sub> in the  
 257 bottom view.

258 (D) Structural differences of the activation gates in KCNQ1-CaM<sub>ML277</sub> and xKCNQ1-  
259 CaM<sub>ML277-7CTI</sub> in the side view. The dashed lines show diagonal atom-to-atom distances  
260 between constriction-forming residues (in Å). The gate in KCNQ1-CaM<sub>ML277</sub> opens up but in  
261 xKCNQ1-CaM<sub>ML277-7CTI</sub> remains closed.  
262



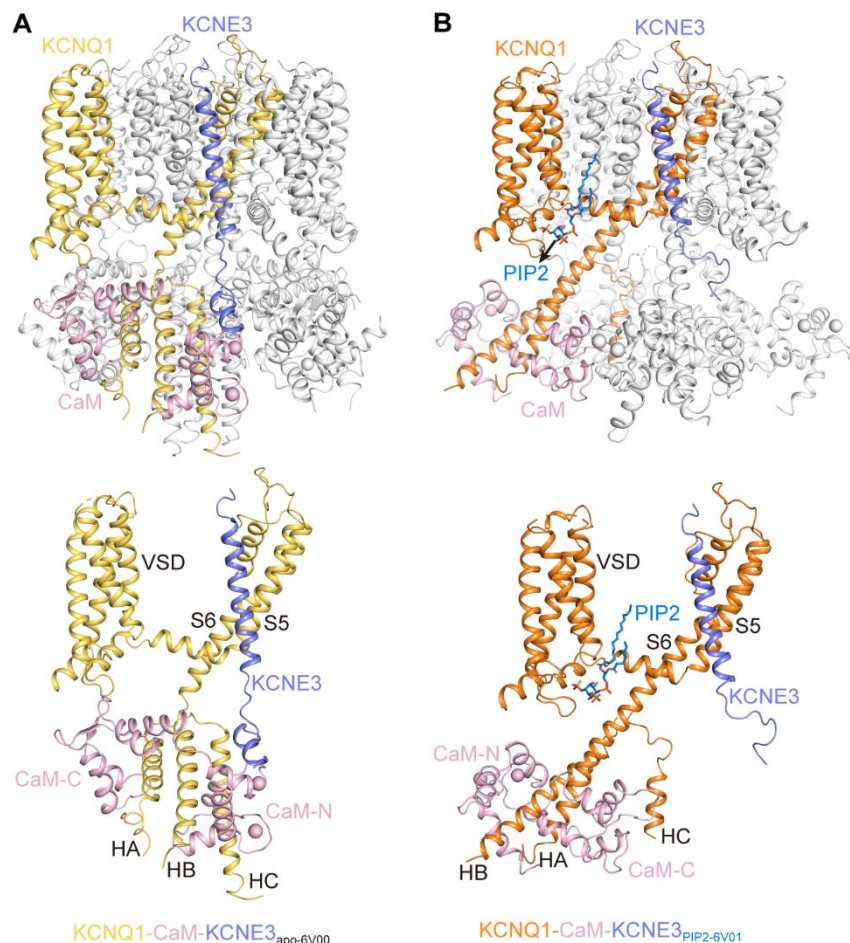

263

264 **Fig S10. Structural comparisons of KCNQ1-CaM-KCNE3<sub>apo-6V00</sub> and KCNQ1-CaM-**  
 265 **KCNE3<sub>PIP2-6V01</sub>.**

266 (A) The overall structure of KCNQ1-CaM-KCNE3<sub>apo-6V00</sub> and one copy of KCNQ1, CaM, and  
 267 KCNE3. S6 and HA are connected by a loop linker and the gate is closed.

268 (B) The overall structure of KCNQ1-CaM-KCNE3<sub>PIP2-6V01</sub> and one copy of KCNQ1, CaM,  
 269 KCNE3, and PIP<sub>2</sub>. PIP<sub>2</sub> binds at the cleft formed by the S2-S3 linker, S3, S4, and S4-S5 linker.  
 270 Upon the PIP<sub>2</sub> binding, CTD and CaM undergo an almost 180° rotation, along with the  
 271 formation of a continuous helix by S6 and HA and the opening of the activation gate.  
 272

**Supplementary Table S1. Data collection and refinement statistics.**

|                                           | KCNQ1-CaM <sub>apo</sub>   | KCNQ1-CaM <sub>ML277</sub> | KCNQ1-CaM <sub>ML277</sub> -PIP2-A | KCNQ1-CaM <sub>ML277</sub> -PIP2-B |
|-------------------------------------------|----------------------------|----------------------------|------------------------------------|------------------------------------|
| <b>Data collection and processing</b>     |                            |                            |                                    |                                    |
| Magnification                             | 49310                      | 49310                      | 49310                              | 49310                              |
| Voltage (kV)                              | 300                        | 300                        | 300                                | 300                                |
| Electron exposure (e-/Å <sup>2</sup> )    | ~ 64                       | ~ 64                       | ~ 64                               | ~ 64                               |
| Defocus range (µm)                        | -1.1 to -1.3               | -1.1 to -1.3               | -1.1 to -1.3                       | -1.1 to -1.3                       |
| Pixel size (Å)                            | 1.014                      | 1.014                      | 1.014                              | 1.014                              |
| Symmetry imposed                          | <i>C4</i>                  | <i>C4</i>                  | <i>C4</i>                          | <i>C4</i>                          |
| Initial particle images (no.)             | 1,683,616                  | 1,197,453                  | 1,018,488                          | 1,018,488                          |
| Final particle images (no.)               | 169,344                    | 200,556                    | 103,745                            | 257,550                            |
| Map resolution (Å)                        | 3.5                        | 2.6                        | 3.1                                | 2.5                                |
| FSC threshold                             | 0.143                      | 0.143                      | 0.143                              | 0.143                              |
|                                           |                            |                            |                                    |                                    |
| <b>Refinement</b>                         |                            |                            |                                    |                                    |
| Initial model used (PDB code)             | KCNQ1-CaM <sub>ML277</sub> | 6UZZ                       |                                    |                                    |
| Model resolution (Å)                      | 3.4                        |                            | 3.3                                | 2.7                                |
| FSC threshold                             | 0.143                      | 0.143                      | 0.143                              | 0.143                              |
| Map sharpening B factor (Å <sup>2</sup> ) | -70                        | -40                        | -60                                | -30                                |
| Model composition                         |                            |                            |                                    |                                    |
| Non-hydrogen atoms                        | 15716                      | 15848                      | 16040                              | 14284                              |
| Protein residues                          | 1968                       | 1968                       | 1968                               | 1896                               |
| ligands                                   | 0                          | 4                          | 8                                  | 8                                  |
| B factors (Å <sup>2</sup> )               |                            |                            |                                    |                                    |
| Protein                                   | 176.52                     | 104.94                     | 109.05                             | 118.18                             |
| R.m.s. deviations                         |                            |                            |                                    |                                    |
| Bond lengths (Å)                          | 0.012                      | 0.020                      | 0.013                              | 0.025                              |
| Bond angles (°)                           | 1.371                      | 1.226                      | 1.083                              | 1.203                              |
| Validation                                |                            |                            |                                    |                                    |
| MolProbity score                          | 2.14                       | 1.13                       | 1.40                               | 2.28                               |
| Clashscore                                | 20.98                      | 1.81                       | 3.42                               | 17.54                              |
| Rotamer outliers (%)                      | 0.00                       | 0.73                       | 0.00                               | 0.00                               |
| Ramachandran plot                         |                            |                            |                                    |                                    |
| Favored (%)                               | 95.30                      | 96.90                      | 96.13                              | 90.45                              |
| Allowed (%)                               | 4.49                       | 3.10                       | 3.87                               | 9.55                               |
| Outliers (%)                              | 0.21                       | 0.00                       | 0.00                               | 0.00                               |

276 **Supplementary Movies:**

277 **Movie S1. ML277-induced conformational changes of KCNQ1-CaM in the context of**  
278 **the whole channel complex.**

279

280 **Movie S2. ML277-induced conformational changes of one KCNQ1 subunit.**

281

282 **Movie S3. ML277-induced opening of the activation gate of KCNQ1 in the bottom view.**

283

284 **Movie S4. PIP<sub>2</sub>-induced structural rearrangement of CTD and CaM in the context of**  
285 **the whole channel complex.**

286

287 **Movie S5. PIP<sub>2</sub>-induced structural rearrangement of CTD and CaM in one KCNQ1**  
288 **subunit.**

289

290 **Movie S6. PIP<sub>2</sub>-induced structural rearrangement of CTD (HA, HB, and HC) in the top**  
291 **view with the TMD omitted for clarity.**

292

293 **Supplementary References**

294

- 295 1. D. N. Mastronarde, Automated electron microscope tomography using robust prediction  
296 of specimen movements. *J Struct Biol* **152**, 36-51 (2005).
- 297 2. S. Q. Zheng *et al.*, MotionCor2: anisotropic correction of beam-induced motion for  
298 improved cryo-electron microscopy. *Nat Methods* **14**, 331-332 (2017).
- 299 3. K. Zhang, Gctf: Real-time CTF determination and correction. *J Struct Biol* **193**, 1-12  
300 (2016).
- 301 4. S. H. W. Scheres, RELION: Implementation of a Bayesian approach to cryo-EM structure  
302 determination. *J Struct Biol* **180**, 519-530 (2012).
- 303 5. J. Sun, R. MacKinnon, Structural basis of human KCNQ1 modulation and gating. *Cell* **180**,  
304 340-347 e349 (2020).
- 305 6. P. Emsley, B. Lohkamp, W. G. Scott, K. Cowtan, Features and development of Coot. *Acta*  
306 *Crystallogr D* **66**, 486-501 (2010).
- 307 7. P. D. Adams *et al.*, PHENIX: a comprehensive Python-based system for macromolecular  
308 structure solution. *Acta Crystallographica Section D-Structural Biology* **66**, 213-221  
309 (2010).
- 310 8. V. B. Chen *et al.*, MolProbity: all-atom structure validation for macromolecular  
311 crystallography. *Acta Crystallographica Section D-Structural Biology* **66**, 12-21 (2010).
- 312 9. O. S. Smart, J. G. Neduelil, X. Wang, B. A. Wallace, M. S. P. Sansom, HOLE: A program  
313 for the analysis of the pore dimensions of ion channel structural models. *J Mol Graph*  
314 *Model* **14**, 354-& (1996).
- 315 10. E. F. Pettersen *et al.*, UCSF Chimera--a visualization system for exploratory research and  
316 analysis. *J Comput Chem* **25**, 1605-1612 (2004).

317
